# Supplementary material for: Increased production of BDNF in colonic epithelial cells induced by fecal supernatants from diarrheic IBS patients
Source: PubMed Central journal article supplement (PMC4441152; doi:10.1038/srep10121), 2015-05-22

**Increased production of BDNF in colonic epithelial cells induced by fecal supernatants from diarrheic IBS patients**

Peng Wang<sup>1,2</sup>, Fei-Xue Chen<sup>1,2</sup>, Chao Du<sup>1,2</sup>, Chang-Qing Li<sup>1,2</sup>, Yan-Bo Yu<sup>1,2</sup>, Xiu-Li Zuo<sup>1,2</sup>, Yan-Qing Li\*<sup>1,2</sup>

<sup>1</sup>Department of Gastroenterology, Qilu Hospital, Shandong University, Jinan 250012, P.R. China

<sup>2</sup>Laboratory of Translational Gastroenterology, Qilu Hospital, Shandong University, Jinan 250012, P.R. China

**\*Correspondence**

Yan-Qing Li, M.D., PH.D.

Department of Gastroenterology, Qilu Hospital, Shandong University, Jinan 250012, China

E-mail: liyanqing@sdu.edu.cn

Tel: +86-531-82169508

Fax: +86-531-82169236

## Supplementary Figure S1

Full scan images of the immunoblots. In several cases, selected data were shown in the manuscript and the PVDF membranes for immunoblots were cut into strips to minimize the amount of antibodies that are necessary for analysis. Scans of entire PVDF strips are provided.

**Figure 3a**

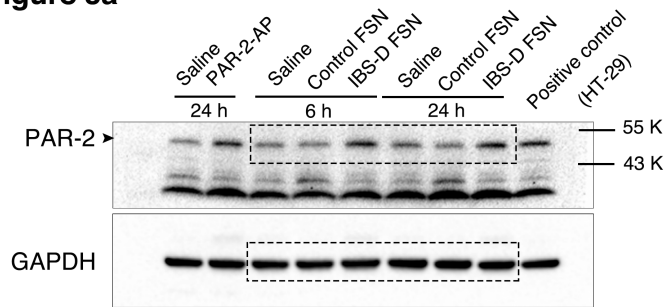

**Figure 3c**

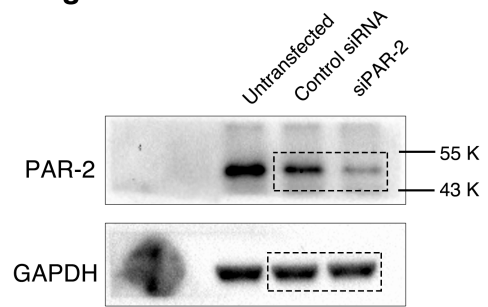

**Figure 3e**

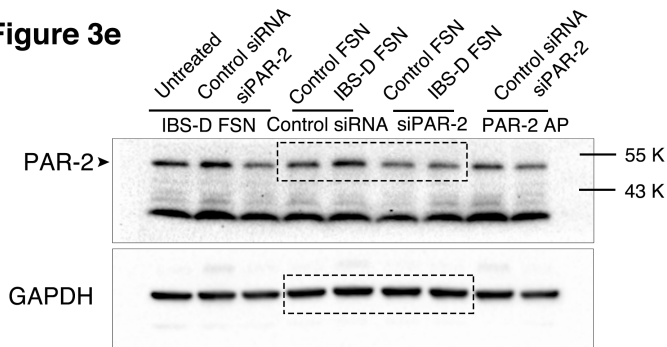

**Figure 4a**

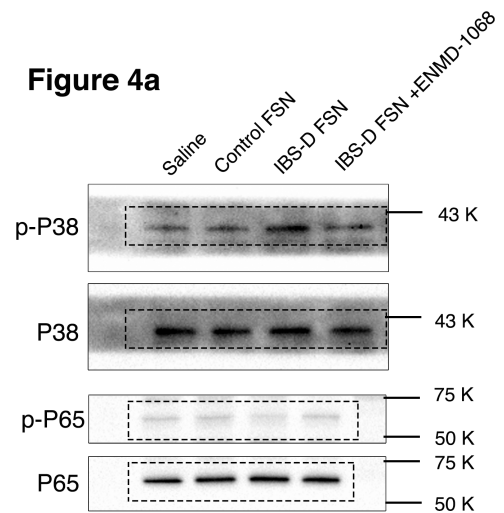

**Figure 5a**

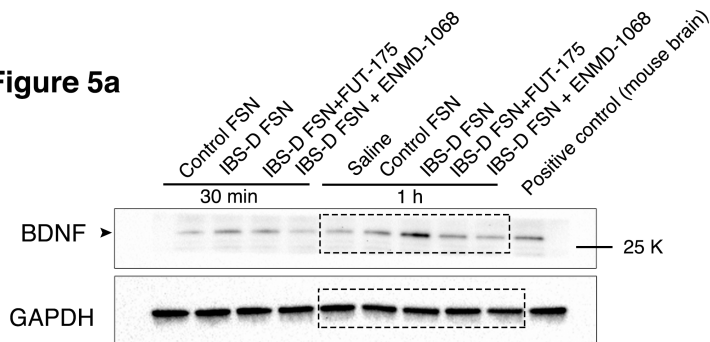

Supplement: srep10121-s1.pdf [file srep10121-s1.pdf]
